# Supplementary material for: Micro-epidemiology of mixed-species malaria infections in a rural population living in the Colombian Amazon region
Source: PubMed Central journal article supplement (PMC5883018; doi:10.1038/s41598-018-23801-9), 2018-04-03
Supplement: 41598_2018_23801_MOESM1_ESM.pdf [file 41598_2018_23801_MOESM1_ESM.pdf]

**Micro-epidemiology of mixed-species malaria infection in a rural population living in  
the Colombian Amazon region**

Milena Camargo <sup>1,2†</sup>, Sara C. Soto-De León <sup>1,3†</sup>, Luisa Del Río-Ospina <sup>1†</sup>, Astrid C. Páez <sup>1</sup>,  
Zanony González <sup>1,5</sup>, Edgardo González <sup>1</sup>, Juan R. Cubides <sup>1</sup>, Paola A. Camargo-Ayala <sup>1</sup>,  
Manuel E. Patarroyo <sup>1,4</sup>, Manuel A. Patarroyo <sup>1,6\*</sup>

<sup>1</sup> Molecular Biology and Immunology Department, Fundación Instituto de Inmunología de Colombia (FIDIC), Bogotá, Colombia

<sup>2</sup> PhD Programme in Biomedical and Biological Sciences, School of Medicine and Health Sciences, Universidad del Rosario, Bogotá DC, Colombia

<sup>3</sup> Universidad de Ciencias Aplicadas y Ambientales (UDCA), Bogotá, Colombia

<sup>4</sup> School of Medicine, Universidad Nacional de Colombia, Bogotá, Colombia

<sup>5</sup> Masters in Epidemiology Programme, School of Medicine and Health Sciences, Universidad del Rosario, Bogotá DC, Colombia

<sup>6</sup> Basic Sciences Department, School of Medicine and Health Sciences, Universidad del Rosario, Bogotá, Colombia

† These authors contributed equally to this work

\* Corresponding author: Professor Manuel A. Patarroyo M.D., Dr.Sc.  
Carrera 50#26-20, Bogotá, Colombia  
e-mail: [mapatarr.fidic@gmail.com](mailto:mapatarr.fidic@gmail.com) (MAP)  
Telephone number: (571) 3244672 ext. 142-143

## Supplementary information legends

**Additional file 1: Table S1.** Description of the target locality and the areas and number of samples included in the study.

**Additional file 2: Fig. S1.** Distribution of the relative frequencies of *Plasmodium* spp. infection and mixed infection, as determined by detection techniques (n=1,995). Part (a) describes thick blood smear (TBS) detection. Part (b) describes detection by PCR.

**Additional file 3: Fig. S2.** Parasite infection distribution/number and the correlation with age. Part (a) shows *Plasmodium* spp. infection (green line), mixed infections (white line). Part (b) shows *P. vivax* (red line), *P. malariae* (blue line) and *P. falciparum* infections (yellow line). The number of samples for each age group is shown in black.

**Additional file 4: Fig. S3.** Distribution of the means for parasitaemia. Part (a) compares the levels of parasitaemia for the areas sampled. Part (b) compares the levels of parasitaemia for single and multiple infections. The continuous line indicates the mean; higher and lower values are represented by whiskers; the dots represent extreme values. A statistically significant difference was observed between the mean parasitaemia values for areas 3 and 4 (Bonferroni test).

**Additional file 5: Table S2.** Distribution of infection cases for *Plasmodium* species among the localities/areas included in this study

**Additional file 6: Table S3.** Distribution of infection cases for *Plasmodium* species and the correlation with settlement type

**Additional file 7: Fig. S4.** Distribution of symptoms and the correlation with the *Plasmodium* spp. infection status, as determined by PCR. Blue represents the uninfected target population. Green represents that proportion of the target population infected by a single species. Dark red represents that proportion of the target population with a mixed infection.

**Additional file 8: Fig. S5.** Distribution of symptoms and the correlation with the infecting *Plasmodium* species

**Additional file 9: Table S4.** Logistic regression for modelling the relationship between risk factors and the combination of infecting species

**Additional file 1: Table S1**

| <b>Sampling Area</b> | <b>Locality</b>          | <b>Acronym</b> | <b>Settlement Type</b> | <b>Number of Samples</b> |
|----------------------|--------------------------|----------------|------------------------|--------------------------|
| Area1<br>(n=344)     | Afasinte                 | AF             | Rural                  | 1                        |
|                      | Arara                    | AR             | Rural                  | 2                        |
|                      | Barrio Nuevo             | BN             | Rural                  | 4                        |
|                      | Caballo Cocha            | CC             | Rural                  | 1                        |
|                      | Canan                    | CA             | Rural                  | 4                        |
|                      | El Calderón              | CL             | Rural                  | 1                        |
|                      | El Porvenir              | PV             | Rural                  | 6                        |
|                      | Humarizal                | HU             | Rural                  | 1                        |
|                      | Jardín                   | JA             | Rural                  | 1                        |
|                      | Jose Maria Hernandez     | JH             | Rural                  | 1                        |
|                      | Km 11                    | K11            | Rural                  | 9                        |
|                      | Km 12                    | K12            | Rural                  | 1                        |
|                      | Km 18                    | K18            | Rural                  | 1                        |
|                      | Km 6                     | K6             | Rural                  | 3                        |
|                      | La Libertad              | LL             | Rural                  | 1                        |
|                      | La Nueva Esperanza       | NE             | Rural                  | 1                        |
|                      | La Playa                 | LP             | Rural                  | 2                        |
|                      | La Sarita                | LS             | Rural                  | 2                        |
|                      | La Unión                 | UN             | Rural                  | 1                        |
|                      | Leticia                  | LT             | Urban                  | 182                      |
|                      | Nazareth                 | NZ             | Rural                  | 33                       |
|                      | Colombia                 | CO             | Rural                  | 1                        |
|                      | Puerto Triunfo           | PT             | Rural                  | 1                        |
|                      | Punta Brava              | PB             | Rural                  | 1                        |
|                      | San Antonio de los Lagos | SA             | Rural                  | 31                       |
|                      | San Juan Bosco           | JB             | Rural                  | 1                        |
|                      | San Juan de los Parentes | JP             | Rural                  | 26                       |
|                      | Simon Bolivar            | SB             | Rural                  | 1                        |
|                      | Ticoya                   | TC             | Rural                  | 8                        |
|                      | Victoria Negra           | VN             | Rural                  | 2                        |
| Yaguas               | YA                       | Rural          | 2                      |                          |
| Zaragoza             | ZA                       | Rural          | 12                     |                          |

|                   |                         |       |       |     |
|-------------------|-------------------------|-------|-------|-----|
| Area 2<br>(n=257) | 20 de Julio             | JU    | Rural | 2   |
|                   | El Vergel               | VE    | Rural | 8   |
|                   | Mocagua                 | MA    | Rural | 14  |
|                   | Macedonia               | MC    | Rural | 34  |
|                   | Palmeras                | PA    | Rural | 12  |
|                   | Patrullero              | PU    | Rural | 2   |
|                   | Puerto Esperanza        | PE    | Rural | 4   |
|                   | Puerto Nariño           | PN    | Urban | 15  |
|                   | San Martin de Amacayacu | SM    | Rural | 164 |
| Valencia          | VA                      | Rural | 2     |     |
| Area 3<br>(n=566) | 12 de Octubre           | OC    | Rural | 509 |
|                   | 7 de Agosto             | AO    | Rural | 9   |
|                   | Boyahuazú               | BO    | Rural | 13  |
|                   | Los Lagos               | LA    | Rural | 4   |
|                   | Naranjales              | NA    | Rural | 5   |
|                   | San Juan de Atacuari    | SJ    | Rural | 25  |
|                   | Tarapoto                | TA    | Rural | 1   |
| Area 4<br>(n=828) | Nuevo Paraíso           | NP    | Rural | 8   |
|                   | Puerto Rico             | PR    | Rural | 87  |
|                   | San Francisco           | SF    | Rural | 13  |
|                   | San Juan del Soco       | JS    | Rural | 110 |
|                   | San Pedro de Tipisca    | SP    | Rural | 494 |
|                   | Santa Teresita          | ST    | Rural | 30  |
|                   | Santarén                | SR    | Rural | 65  |
|                   | Villa Andrea            | VI    | Rural | 21  |

Additional file 2: Fig. S1.

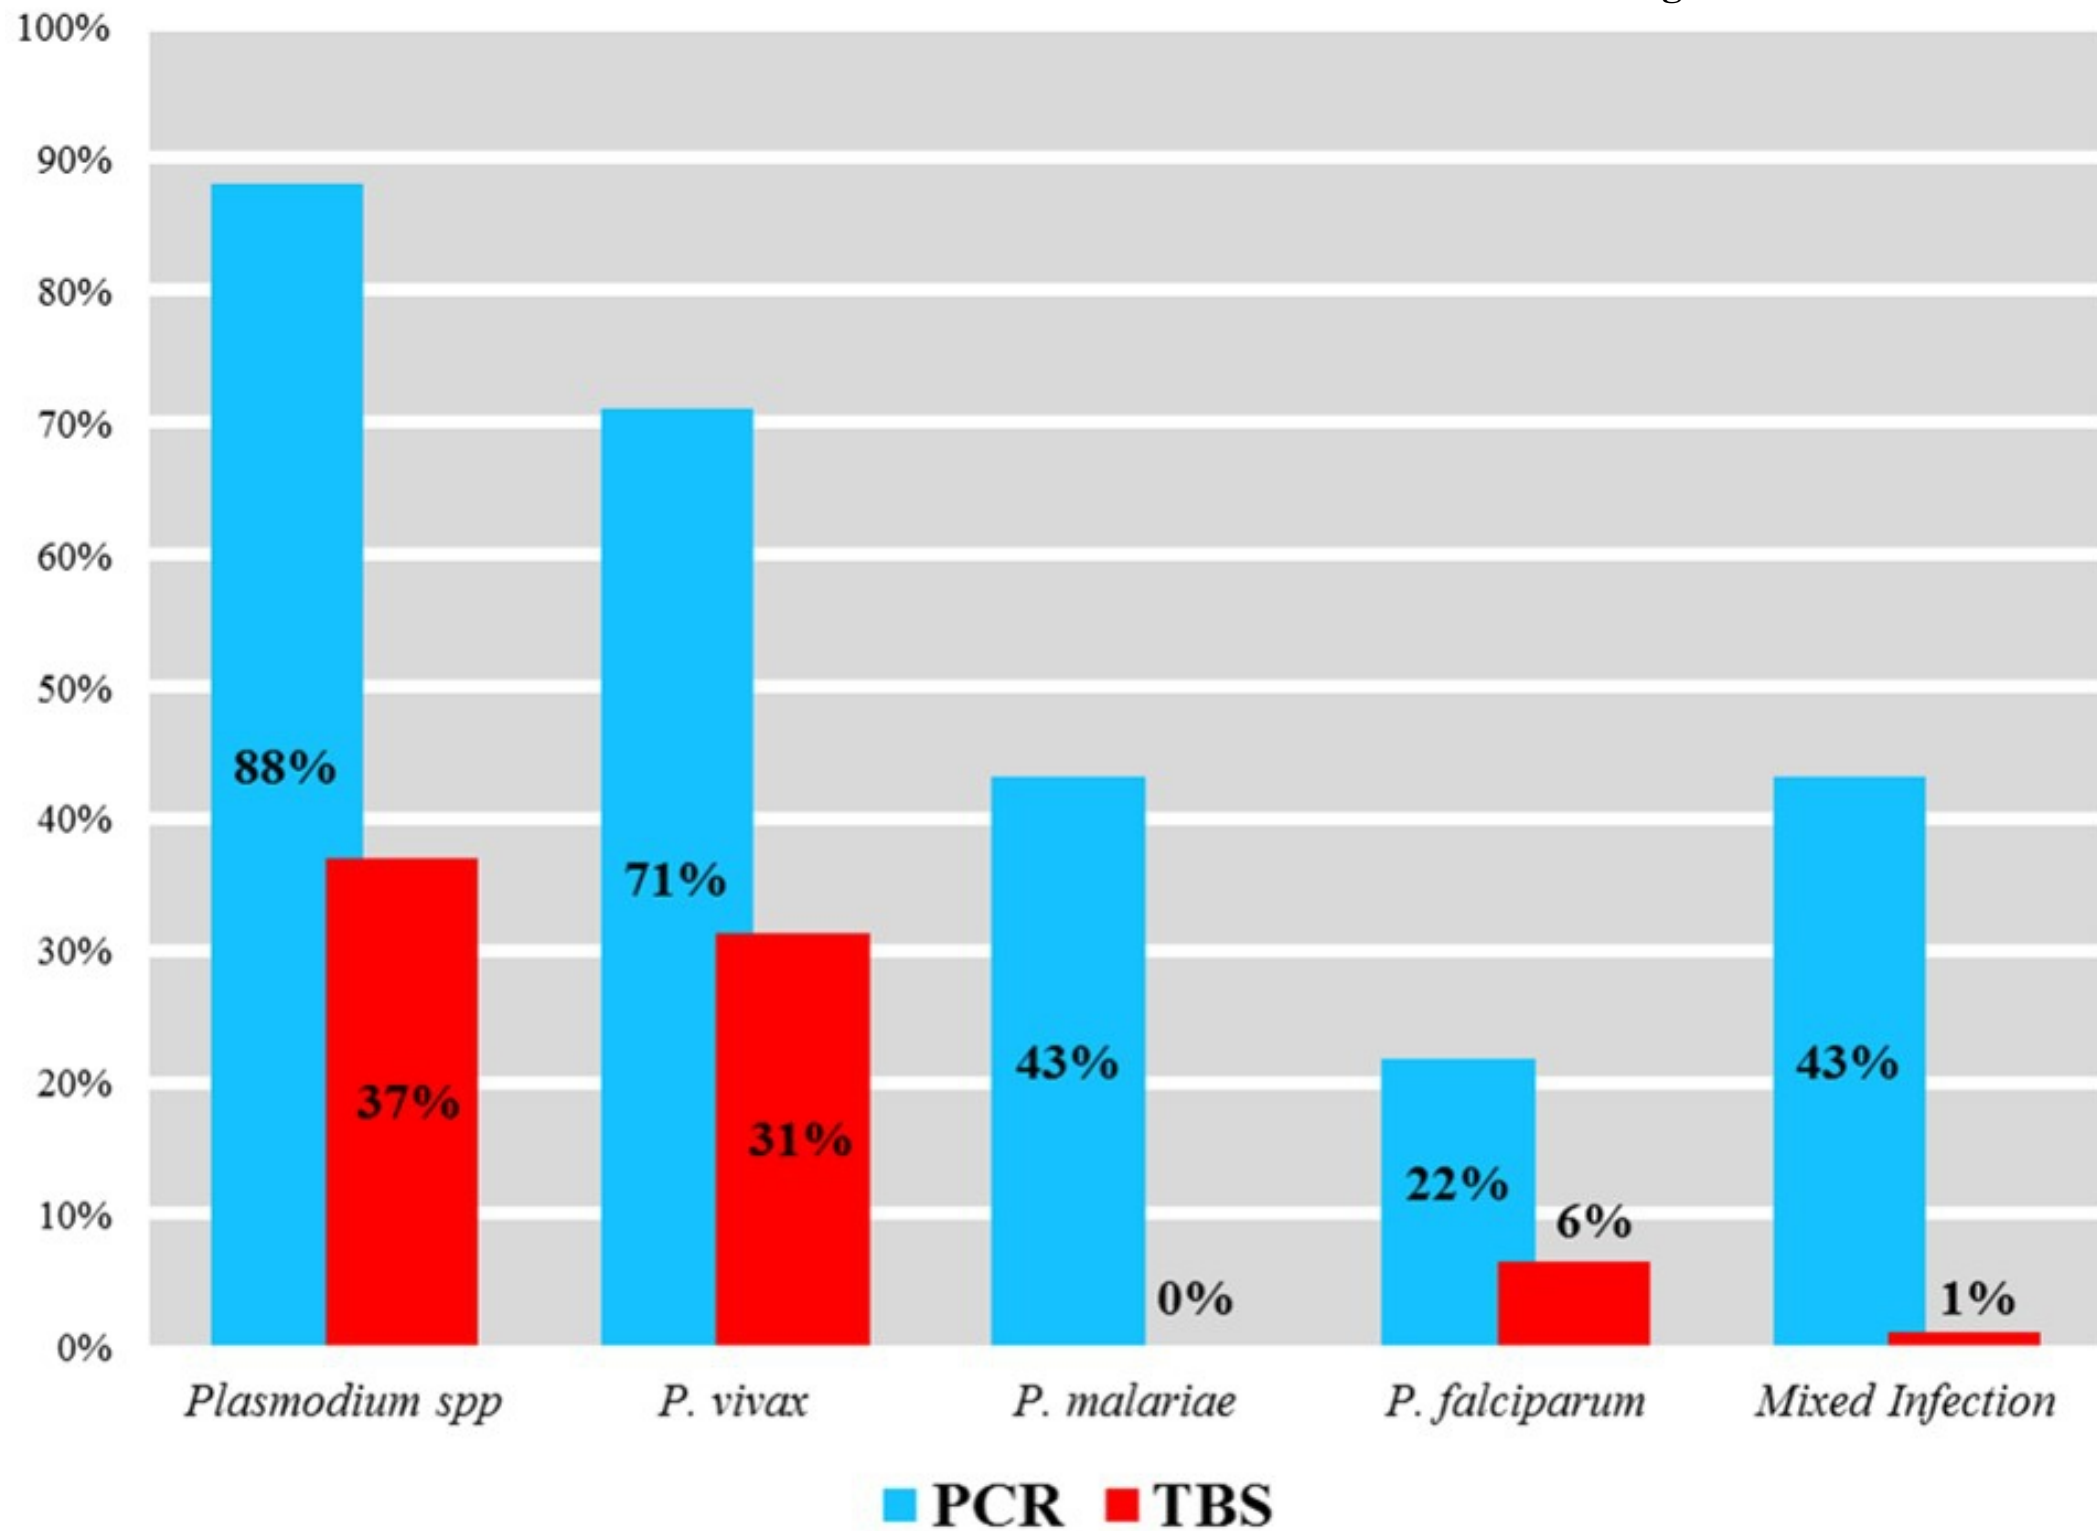

Additional file 3: Fig. S2.

a)

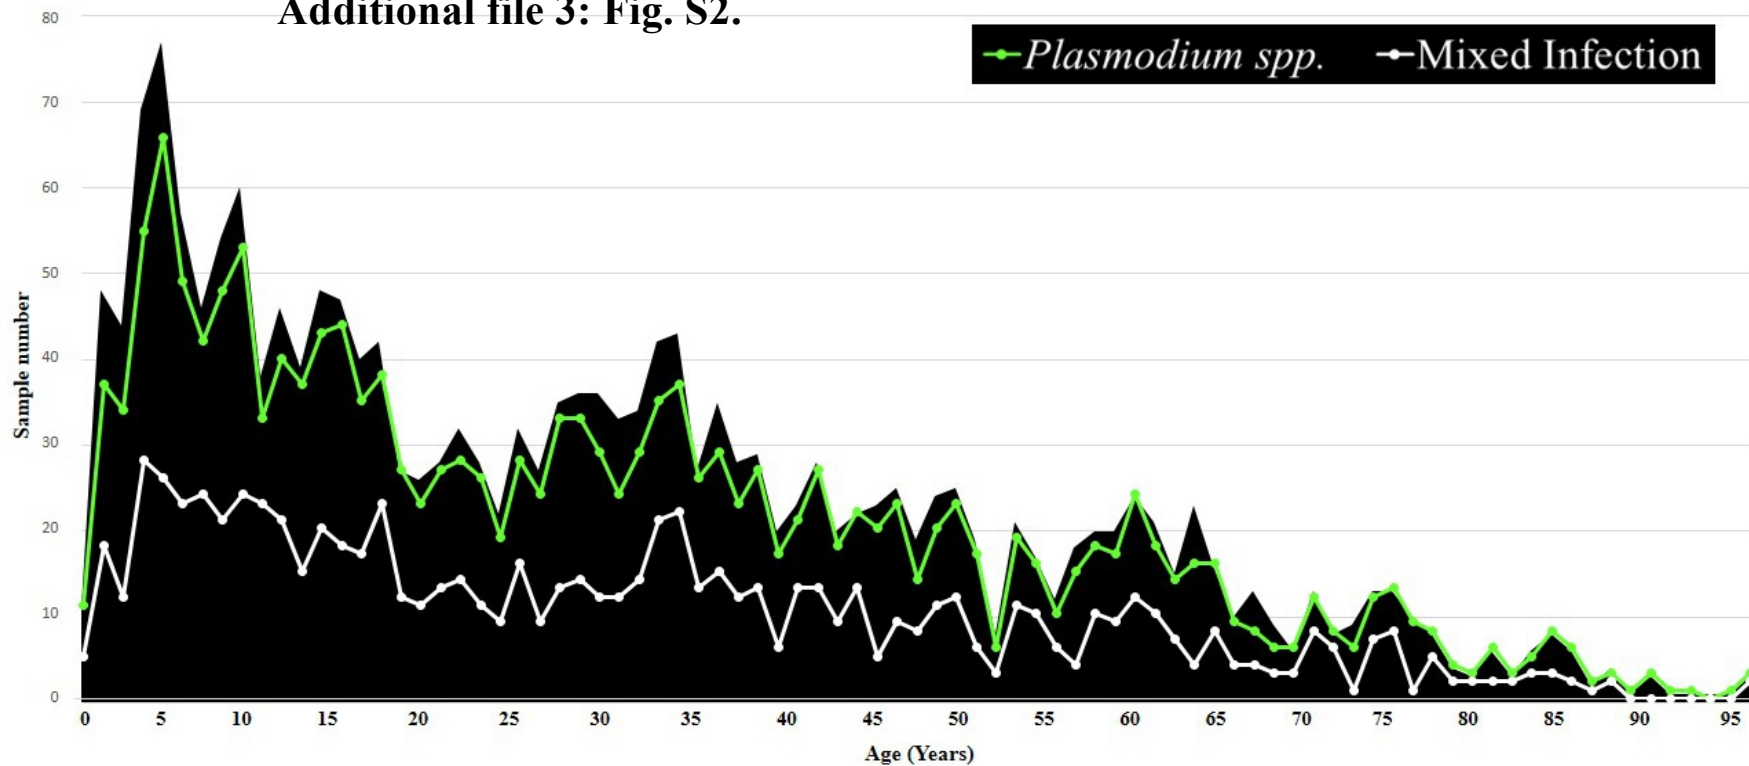

b)

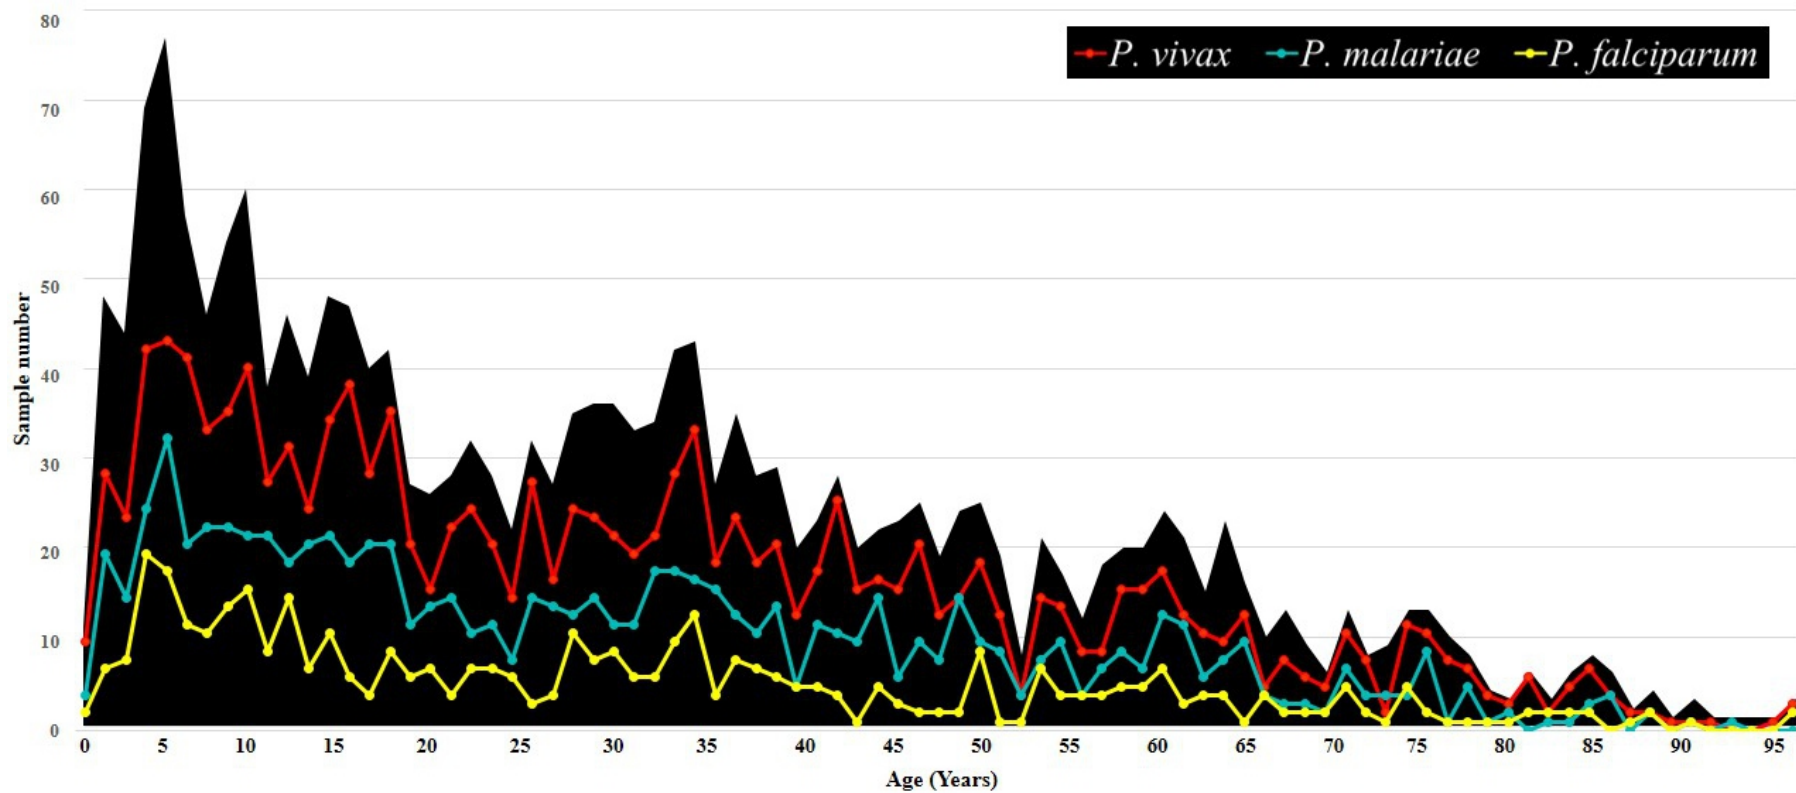

a)

Additional file 4: Fig. S3.

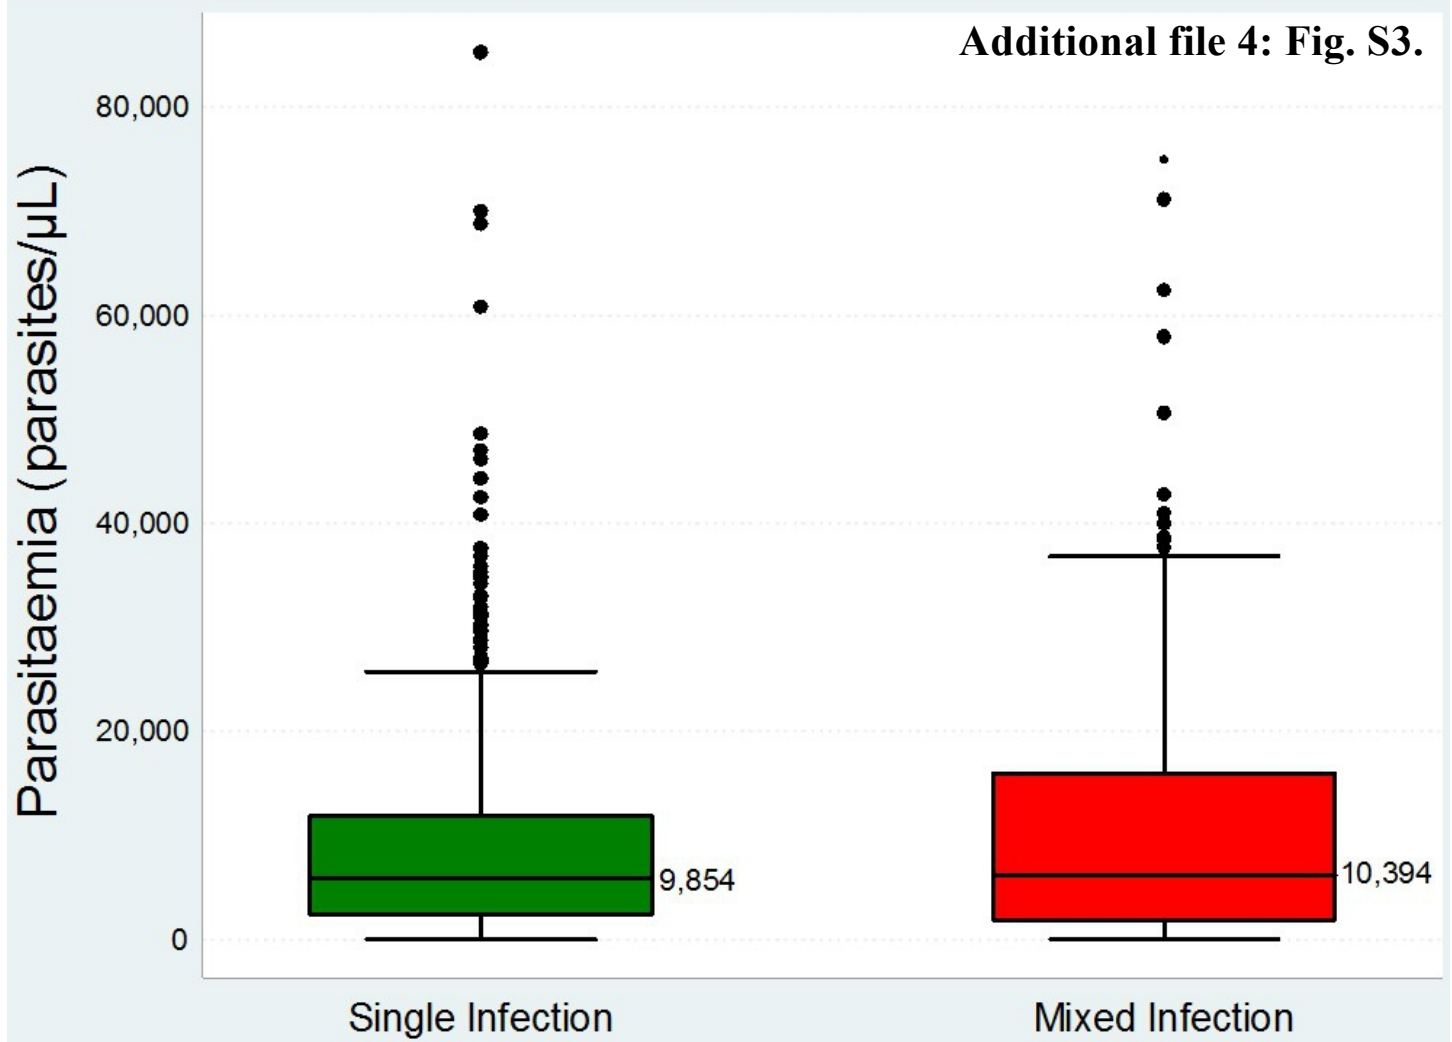

b)

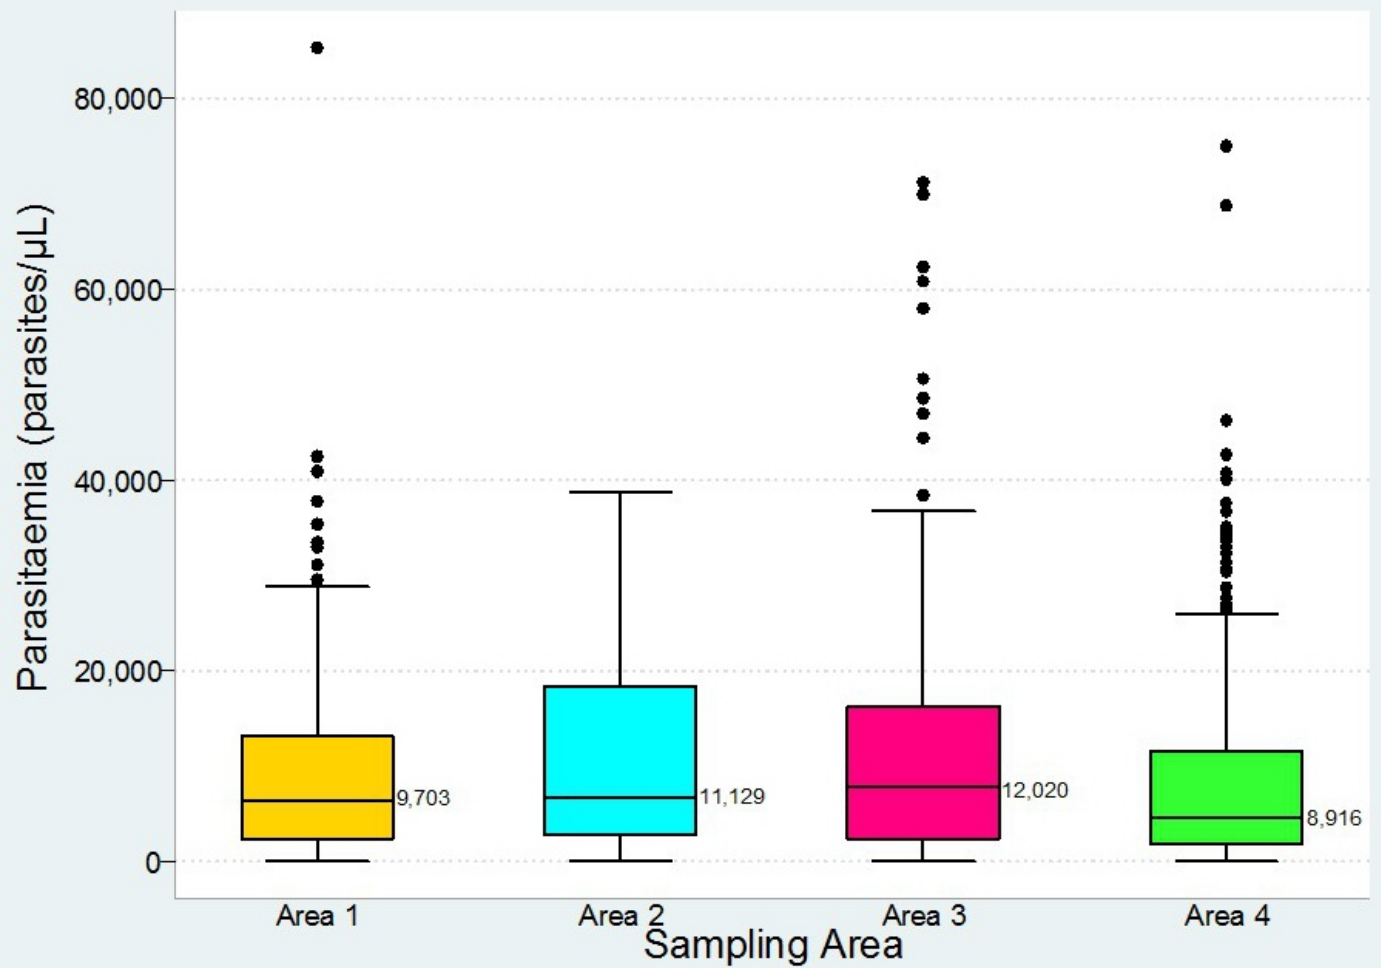



**Additional file 5: Table S2.**

| Locality                 | Number of Samples | <i>Plasmodium</i> spp. |                | <i>P. vivax</i> |                | <i>P. malariae</i> |                | <i>P. falciparum</i> |                |
|--------------------------|-------------------|------------------------|----------------|-----------------|----------------|--------------------|----------------|----------------------|----------------|
|                          |                   | <i>n</i>               | % <sup>†</sup> | <i>n</i>        | % <sup>†</sup> | <i>n</i>           | % <sup>†</sup> | <i>n</i>             | % <sup>†</sup> |
| Afasinte                 | 1                 | 1                      | 100            | 1               | 100            | 1                  | 100            | 0                    | 0.0            |
| Arara                    | 2                 | 2                      | 100            | 2               | 100            | 0                  | 0.0            | 0                    | 0.0            |
| Barrio Nuevo             | 4                 | 4                      | 100            | 4               | 100            | 2                  | 50.0           | 0                    | 0.0            |
| Caballo Cocha            | 1                 | 1                      | 100            | 1               | 100            | 1                  | 100            | 0                    | 0.0            |
| Canan                    | 4                 | 4                      | 100            | 4               | 100            | 0                  | 0.0            | 1                    | 25.0           |
| El Calderón              | 1                 | 1                      | 100            | 1               | 100            | 0                  | 0.0            | 0                    | 0.0            |
| El Porvenir              | 6                 | 6                      | 100            | 4               | 66.7           | 2                  | 33.3           | 0                    | 0.0            |
| Humarizal                | 1                 | 1                      | 100            | 1               | 100            | 1                  | 100            | 0                    | 0.0            |
| Jardín                   | 1                 | 1                      | 100            | 1               | 100            | 1                  | 100            | 0                    | 0.0            |
| Jose Maria Hernandez     | 1                 | 0                      | 0.0            | 0               | 0.0            | 0                  | 0.0            | 0                    | 0.0            |
| Km 11                    | 9                 | 9                      | 100            | 6               | 66.7           | 9                  | 100            | 0                    | 0.0            |
| Km 12                    | 1                 | 1                      | 100            | 1               | 100            | 1                  | 100            | 0                    | 0.0            |
| Km 18                    | 1                 | 1                      | 100            | 1               | 100            | 0                  | 0.0            | 0                    | 0.0            |
| Km 6                     | 3                 | 3                      | 100            | 1               | 33.3           | 3                  | 100            | 0                    | 0.0            |
| La Libertad              | 1                 | 1                      | 100            | 1               | 100            | 1                  | 100            | 0                    | 0.0            |
| La Nueva Esperanza       | 1                 | 1                      | 100            | 1               | 100            | 1                  | 100            | 0                    | 0.0            |
| La Playa                 | 2                 | 1                      | 50.0           | 1               | 50.0           | 1                  | 50.0           | 0                    | 0.0            |
| La Sarita                | 2                 | 1                      | 50.0           | 1               | 50.0           | 1                  | 50.0           | 0                    | 0.0            |
| La Unión                 | 1                 | 1                      | 100            | 1               | 100            | 1                  | 100            | 1                    | 100            |
| Leticia                  | 182               | 166                    | 91.2           | 153             | 84.1           | 74                 | 40.7           | 8                    | 4.4            |
| Nazareth                 | 33                | 26                     | 78.8           | 20              | 60.6           | 22                 | 66.7           | 0                    | 0.0            |
| Colombia                 | 1                 | 1                      | 100            | 1               | 100            | 1                  | 100            | 0                    | 0.0            |
| Puerto Triunfo           | 1                 | 1                      | 100            | 1               | 100            | 1                  | 100            | 0                    | 0.0            |
| Punta Brava              | 1                 | 1                      | 100            | 0               | 0.0            | 1                  | 100            | 0                    | 0.0            |
| San Antonio de los Lagos | 31                | 19                     | 14             | 2               | 14             | 31                 | 19             | 14                   | 2              |
| San Juan Bosco           | 1                 | 1                      | 100            | 1               | 100            | 0                  | 0.0            | 0                    | 0.0            |
| San Juan de los Parentes | 26                | 18                     | 69.2           | 13              | 50.0           | 9                  | 34.6           | 2                    | 7.7            |
| Simon Bolivar            | 1                 | 0                      | 0.0            | 0               | 0.0            | 0                  | 0.0            | 0                    | 0.0            |
| Ticoya                   | 8                 | 8                      | 100            | 6               | 75.0           | 5                  | 62.5           | 3                    | 37.5           |
| Victoria Negra           | 2                 | 1                      | 50.0           | 1               | 50.0           | 0                  | 0.0            | 0                    | 0.0            |
| Yaguas                   | 2                 | 2                      | 100            | 0               | 0.0            | 1                  | 50.0           | 1                    | 50.0           |
| Zaragoza                 | 12                | 11                     | 91.7           | 3               | 25.0           | 10                 | 83.3           | 0                    | 0.0            |

<sup>†</sup> Percentage are calculated taking into account the number of samples taken for each locality.

| Locality                | Number of Samples | <i>Plasmodium spp.</i> |                | <i>P. vivax</i> |                | <i>P. malariae</i> |                | <i>P. falciparum</i> |                |
|-------------------------|-------------------|------------------------|----------------|-----------------|----------------|--------------------|----------------|----------------------|----------------|
|                         |                   | <i>n</i>               | % <sup>†</sup> | <i>n</i>        | % <sup>†</sup> | <i>n</i>           | % <sup>†</sup> | <i>n</i>             | % <sup>†</sup> |
| <i>Area 2</i>           |                   |                        |                |                 |                |                    |                |                      |                |
| 20 de Julio             | 2                 | 2                      | 100            | 2               | 100            | 0                  | 0.0            | 0                    | 0.0            |
| El Vergel               | 8                 | 8                      | 100            | 7               | 87.5           | 4                  | 50.0           | 0                    | 0.0            |
| Mocagua                 | 14                | 14                     | 100            | 14              | 100            | 5                  | 35.7           | 3                    | 21.4           |
| Macedonia               | 34                | 25                     | 73.5           | 15              | 44.1           | 15                 | 44.1           | 9                    | 26.5           |
| Palmeras                | 12                | 9                      | 75.0           | 8               | 66.7           | 5                  | 41.7           | 3                    | 25.0           |
| Patrullero              | 2                 | 2                      | 100            | 1               | 50.0           | 1                  | 50.0           | 0                    | 0.0            |
| Puerto Esperanza        | 4                 | 4                      | 100            | 4               | 100            | 2                  | 50.0           | 2                    | 50.0           |
| Puerto Nariño           | 15                | 14                     | 93.3           | 13              | 86.7           | 5                  | 33.3           | 0                    | 0.0            |
| San Martin de Amacayacu | 164               | 156                    | 95.1           | 132             | 80.5           | 71                 | 43.3           | 66                   | 40.2           |
| Valencia                | 2                 | 2                      | 100            | 1               | 50.0           | 1                  | 50.0           | 1                    | 50.0           |

<sup>†</sup> Percentage are calculated taking into account the number of samples taken for each locality.

| Locality             | Number of Samples | <i>Plasmodium spp.</i> |                | <i>P. vivax</i> |                | <i>P. malariae</i> |                | <i>P. falciparum</i> |                |
|----------------------|-------------------|------------------------|----------------|-----------------|----------------|--------------------|----------------|----------------------|----------------|
|                      |                   | <i>n</i>               | % <sup>†</sup> | <i>n</i>        | % <sup>†</sup> | <i>n</i>           | % <sup>†</sup> | <i>n</i>             | % <sup>†</sup> |
| <i>Area 3</i>        |                   |                        |                |                 |                |                    |                |                      |                |
| 12 de Octubre        | 509               | 450                    | 88.4           | 364             | 71.5           | 230                | 45.2           | 110                  | 21.6           |
| 7 de Agosto          | 9                 | 9                      | 100            | 7               | 77.8           | 5                  | 55.6           | 1                    | 11.1           |
| Boyahuazú            | 13                | 11                     | 84.6           | 10              | 76.9           | 4                  | 30.8           | 0                    | 0.0            |
| Los Lagos            | 4                 | 4                      | 100            | 2               | 50.0           | 3                  | 75.0           | 0                    | 0.0            |
| Naranjales           | 5                 | 5                      | 100            | 4               | 80.0           | 1                  | 20.0           | 1                    | 20.0           |
| San Juan de Atacuari | 25                | 24                     | 96.0           | 16              | 64.0           | 8                  | 32.0           | 11                   | 44.0           |
| Tarapoto             | 1                 | 1                      | 100            | 1               | 100            | 1                  | 100            | 0                    | 0.0            |

<sup>†</sup> Percentage are calculated taking into account the number of samples taken for each locality.

| Locality             | Number of Samples | <i>Plasmodium spp.</i> |                | <i>P. vivax</i> |                | <i>P. malariae</i> |                | <i>P. falciparum</i> |                |
|----------------------|-------------------|------------------------|----------------|-----------------|----------------|--------------------|----------------|----------------------|----------------|
|                      |                   | <i>n</i>               | % <sup>†</sup> | <i>n</i>        | % <sup>†</sup> | <i>n</i>           | % <sup>†</sup> | <i>n</i>             | % <sup>†</sup> |
| <i>Area 4</i>        |                   |                        |                |                 |                |                    |                |                      |                |
| Nuevo Paraíso        | 8                 | 6                      | 75.0           | 3               | 37.5           | 4                  | 50.0           | 3                    | 37.5           |
| Puerto Rico          | 87                | 81                     | 93.1           | 66              | 75.9           | 48                 | 55.2           | 21                   | 24.1           |
| San Francisco        | 13                | 10                     | 76.9           | 9               | 69.2           | 5                  | 38.5           | 0                    | 0.0            |
| San Juan del Soco    | 110               | 103                    | 93.6           | 90              | 81.8           | 55                 | 50.0           | 15                   | 13.6           |
| San Pedro de Tipisca | 494               | 425                    | 86.0           | 324             | 65.6           | 184                | 37.2           | 147                  | 29.8           |
| Santa Teresita       | 30                | 24                     | 80.0           | 22              | 73.3           | 12                 | 40.0           | 4                    | 13.3           |
| Santarén             | 65                | 47                     | 72.3           | 36              | 55.4           | 21                 | 32.3           | 12                   | 18.5           |
| Villa Andrea         | 21                | 19                     | 90.5           | 15              | 71.4           | 8                  | 38.1           | 5                    | 23.8           |

<sup>†</sup> Percentage are calculated taking into account the number of samples taken for each locality.

## Additional file 6: Table S3.

| Locality                      | Number of Samples | <i>Plasmodium spp.</i> |                |                 | <i>P. vivax</i> |                |                 | <i>P. malariae</i> |                |                 | <i>P. falciparum</i> |                |                 |
|-------------------------------|-------------------|------------------------|----------------|-----------------|-----------------|----------------|-----------------|--------------------|----------------|-----------------|----------------------|----------------|-----------------|
|                               |                   | <i>n</i>               | % <sup>+</sup> | PI <sup>°</sup> | <i>n</i>        | % <sup>+</sup> | PI <sup>°</sup> | <i>n</i>           | % <sup>+</sup> | PI <sup>°</sup> | <i>n</i>             | % <sup>+</sup> | PI <sup>°</sup> |
| Leticia <sup>†</sup>          | 182               | 166                    | 91.2           | 3.99            | 153             | 84.1           | 3.67            | 74                 | 40.7           | 1.78            | 8                    | 4.4            | 0.19            |
| Puerto Nariño <sup>†</sup>    | 15                | 14                     | 93.3           | 1.69            | 13              | 86.7           | 1.57            | 5                  | 33.3           | 0.6             | 0                    | 0.0            | 0               |
| Other Localities <sup>*</sup> | 1,798             | 1,570                  | 87.3           | 57.8            | 1,246           | 69.3           | 45.9            | 783                | 43.5           | 28.8            | 424                  | 23.6           | 15.6            |
| <b>Total</b>                  | 1,995             | 1,750                  | 87.7           | 22.7            | 1,412           | 70.8           | 18.3            | 862                | 43.2           | 11.2            | 432                  | 21.7           | 5.6             |

PI= Parasite index; <sup>†</sup> Localities of Leticia and Puerto Nariño correspond to urban settlement type; <sup>\*</sup> Other Localities correspond to rural settlement type; <sup>+</sup> Percentages were calculated taking into account the number of samples taken for each locality. <sup>°</sup> PI was calculated taking into account the number of inhabitants projected in 2016 <sup>1</sup>.

1 Carebilla, M. A. Plan de Desarrollo Amazonas 2016-2019. Gestión y Ejecución para el Bienestar, la Conservación Ambiental y la Paz. (2015).

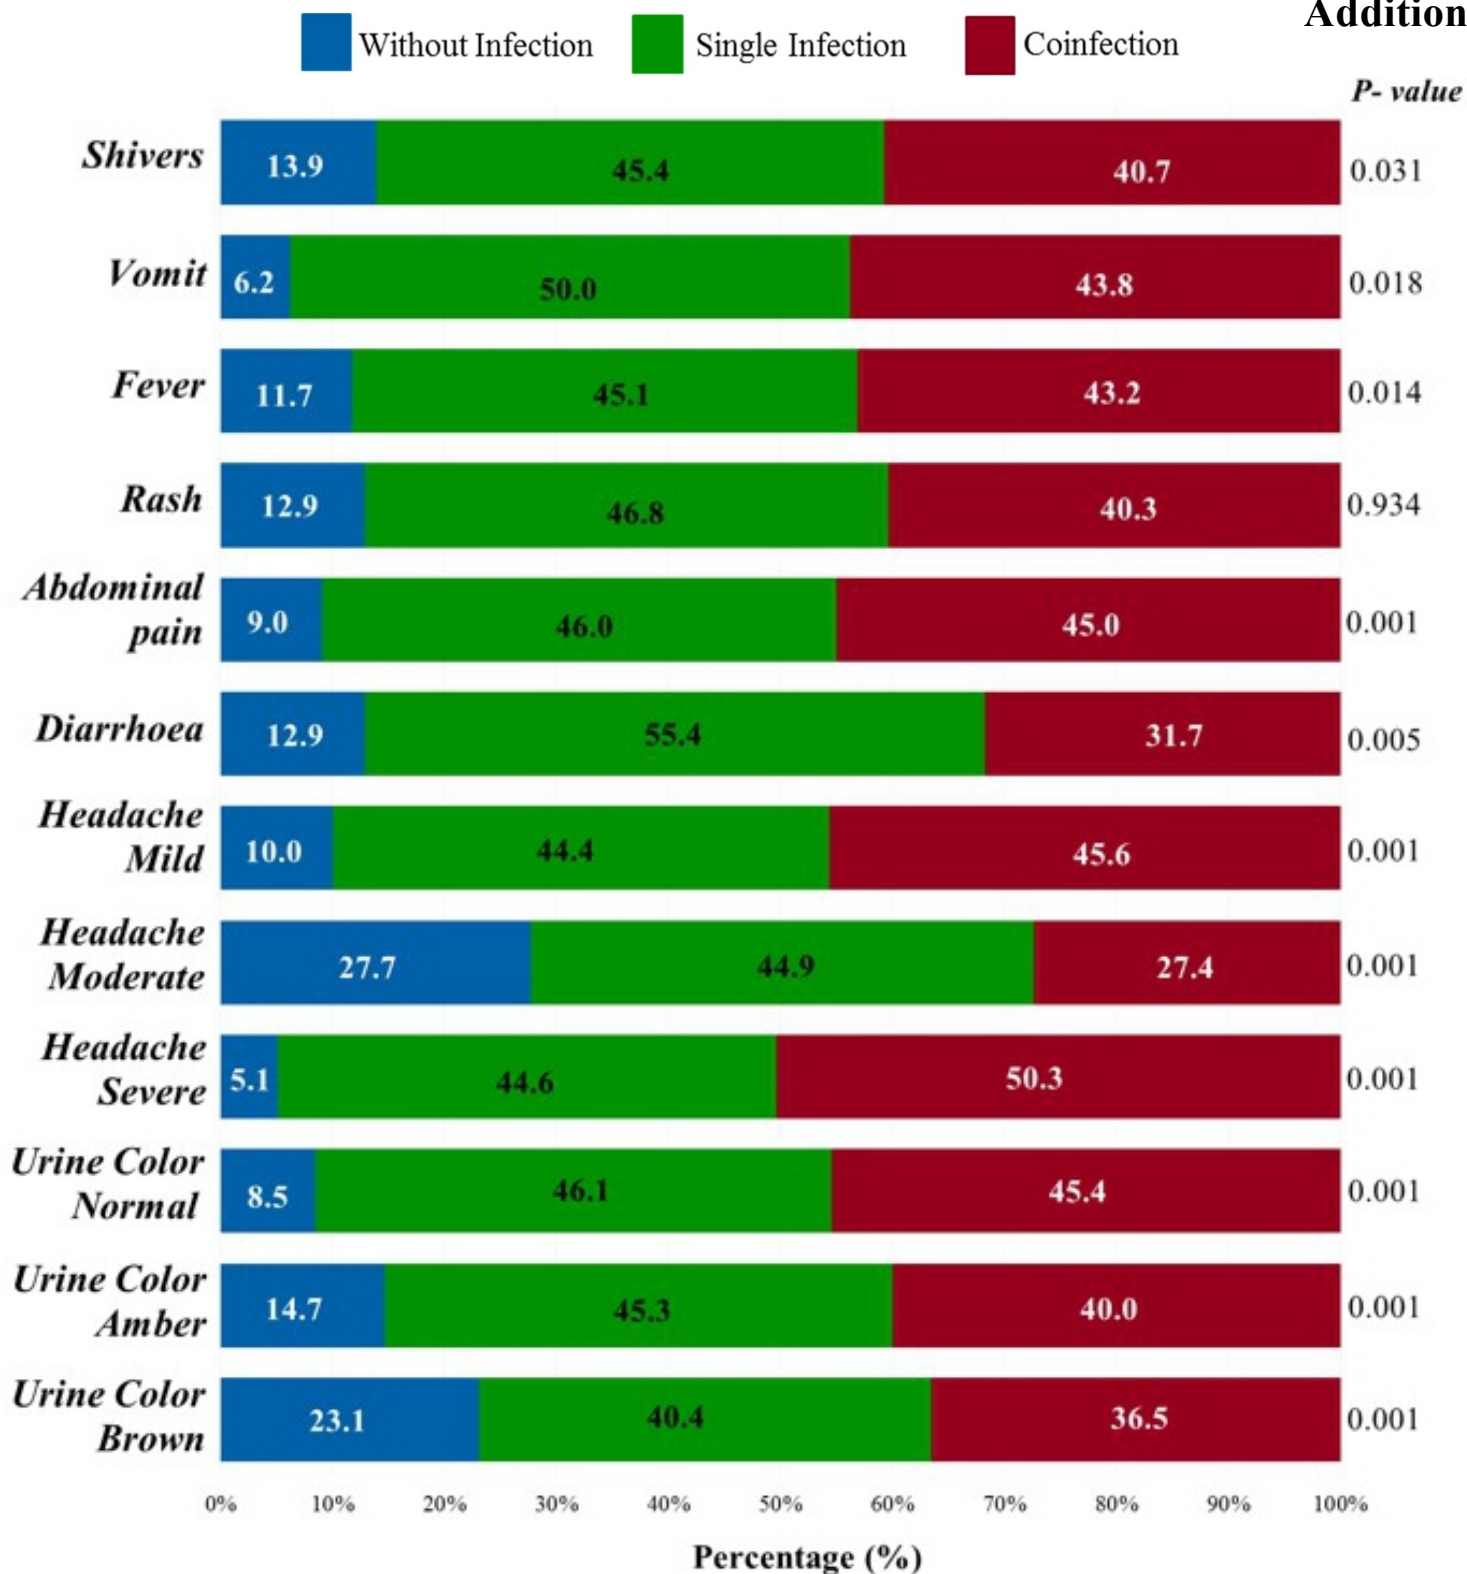

Additional file 8: Fig. S5.

*P. vivax*

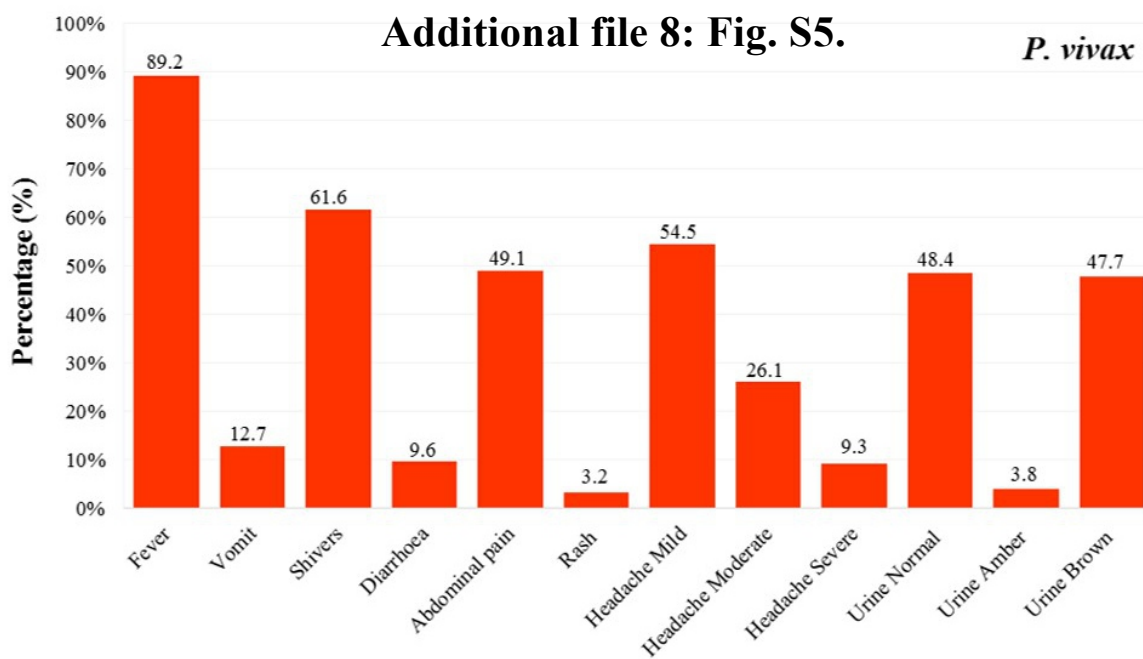

Symptoms

*P. malariae*

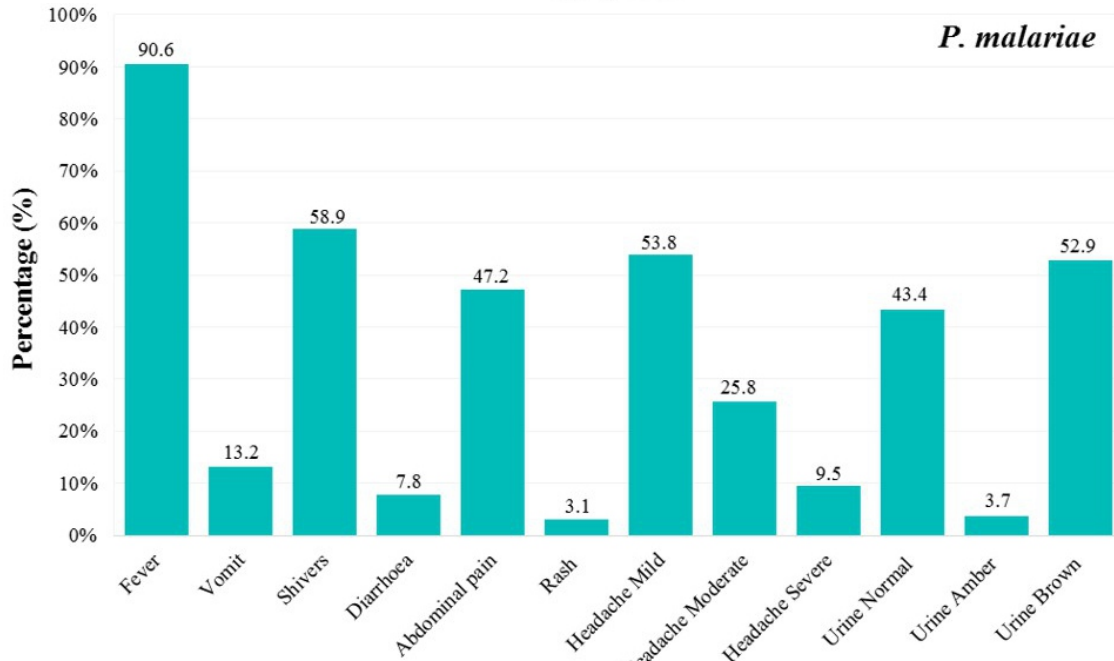

Symptoms

*P. falciparum*

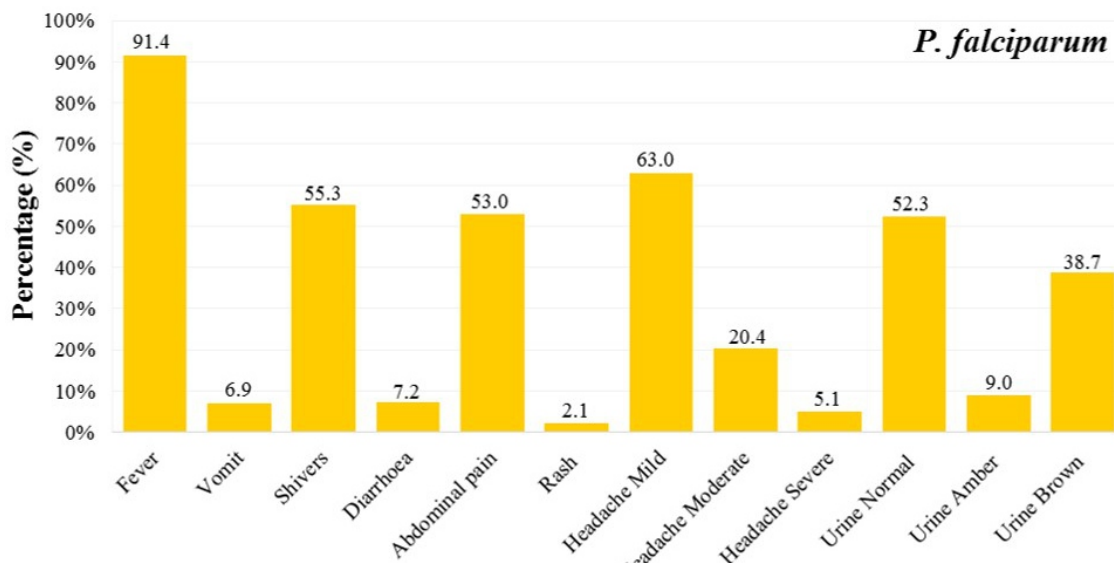

Symptoms

**Additional file 9: Table S4.**

| Variable                       | COMBINATION OF PARASITES SPECIES       |                    |                                          |             |                                             |                    |                                                                 |                    |
|--------------------------------|----------------------------------------|--------------------|------------------------------------------|-------------|---------------------------------------------|--------------------|-----------------------------------------------------------------|--------------------|
|                                | <i>P. vivax</i> and <i>P. malariae</i> |                    | <i>P. vivax</i> and <i>P. falciparum</i> |             | <i>P. malariae</i> and <i>P. falciparum</i> |                    | <i>P. vivax</i> and <i>P. malariae</i> and <i>P. falciparum</i> |                    |
|                                | OR adjusted <sup>a</sup>               | 95%CI              | OR adjusted <sup>a</sup>                 | 95%CI       | OR adjusted <sup>a</sup>                    | 95%CI              | OR adjusted <sup>a</sup>                                        | 95%CI              |
| <b>Age, years</b>              |                                        |                    |                                          |             |                                             |                    |                                                                 |                    |
| ≤5                             | 0.87                                   | 0.48 - 1.58        | 1.15                                     | 0.40 - 3.27 | 0.56                                        | 0.10 - 3.00        | 1.16                                                            | 0.40 - 3.34        |
| 6 - 12                         | 0.88                                   | 0.43 - 1.77        | 0.82                                     | 0.33 - 2.03 | 0.85                                        | 0.25 - 2.83        | 1.41                                                            | 0.60 - 3.30        |
| 13 - 18                        | 0.95                                   | 0.51 - 1.76        | 1.18                                     | 0.41 - 3.34 | 0.97                                        | 0.23 - 4.10        | 1.62                                                            | 0.58 - 4.47        |
| 19 - 30                        | 1.13                                   | 0.66 - 1.95        | 1.36                                     | 0.59 - 3.12 | 0.71                                        | 0.19 - 2.64        | 1.39                                                            | 0.58 - 3.35        |
| 31 - 60                        | Reference                              |                    | Reference                                |             | Reference                                   |                    | Reference                                                       |                    |
| ≥60                            | 0.41                                   | 0.16 - 1.00        | 1.80                                     | 0.56 - 5.71 | 0.76                                        | 0.47 - 1.23        | 1.03                                                            | 0.21 - 4.99        |
| <b>Gender</b>                  |                                        |                    |                                          |             |                                             |                    |                                                                 |                    |
| Male                           | Reference                              |                    | Reference                                |             | Reference                                   |                    | Reference                                                       |                    |
| Female                         | 1.00                                   | 0.71 - 1.40        | 0.86                                     | 0.47 - 1.56 | 1.84                                        | 0.71 - 4.72        | 1.59                                                            | 0.86 - 2.96        |
| <b>Sampling area</b>           |                                        |                    |                                          |             |                                             |                    |                                                                 |                    |
| Area 1                         | <b>2.13</b>                            | <b>1.33 - 3.42</b> | 0.29                                     | 0.83 - 1.05 | 0.77                                        | 0.43 - 1.39        | 0.88                                                            | 0.20 - 1.67        |
| Area 2                         | 1.29                                   | 0.74 - 2.24        | 2.03                                     | 0.89 - 4.62 | 0.23                                        | 0.27 - 1.98        | 1.06                                                            | 0.41 - 2.75        |
| Area 3                         | 0.66                                   | 0.18 - 2.45        | 1.43                                     | 0.29 - 7.10 | 0.83                                        | 0.52 - 1.34        | 0.78                                                            | 0.98 - 1.65        |
| Area 4                         | Reference                              |                    | Reference                                |             | Reference                                   |                    | Reference                                                       |                    |
| <b>Water stagnation nearby</b> |                                        |                    |                                          |             |                                             |                    |                                                                 |                    |
| No                             | Reference                              |                    | Reference                                |             | Reference                                   |                    | Reference                                                       |                    |
| Yes                            | 1.11                                   | 0.77 - 1.60        | 0.85                                     | 0.44 - 1.61 | 1.42                                        | 0.52 - 3.88        | 0.72                                                            | 0.36 - 1.41        |
| <b>Insecticide use</b>         |                                        |                    |                                          |             |                                             |                    |                                                                 |                    |
| No                             | Reference                              |                    | Reference                                |             | Reference                                   |                    | Reference                                                       |                    |
| Yes                            | 0.96                                   | 0.81 - 1.14        | 0.78                                     | 0.51 - 1.19 | 0.75                                        | 0.36 - 1.54        | 1.06                                                            | 0.74 - 1.51        |
| <b>Mosquito net use</b>        |                                        |                    |                                          |             |                                             |                    |                                                                 |                    |
| No                             | Reference                              |                    | Reference                                |             | Reference                                   |                    | Reference                                                       |                    |
| Yes                            | 0.73                                   | 0.49 - 1.12        | 0.58                                     | 0.18 - 1.82 | 1.03                                        | 0.11 - 8.96        | 3.32                                                            | 0.41 - 9.31        |
| <b>Gas public service</b>      |                                        |                    |                                          |             |                                             |                    |                                                                 |                    |
| No                             | Reference                              |                    | Reference                                |             | Reference                                   |                    | Reference                                                       |                    |
| Yes                            | 0.74                                   | 0.34 - 1.06        | 1.02                                     | 0.46 - 2.29 | 1.70                                        | 0.52 - 5.49        | 1.05                                                            | 0.47 - 2.34        |
| <b>Public light service</b>    |                                        |                    |                                          |             |                                             |                    |                                                                 |                    |
| No                             | Reference                              |                    | Reference                                |             | Reference                                   |                    | Reference                                                       |                    |
| Yes                            | 0.60                                   | 0.49 - 1.57        | 2.05                                     | 0.58 - 7.20 | 1.78                                        | 0.20 - 9.89        | 1.48                                                            | 0.41 - 5.27        |
| <b>Public water</b>            |                                        |                    |                                          |             |                                             |                    |                                                                 |                    |
| No                             | Reference                              |                    | Reference                                |             | Reference                                   |                    | Reference                                                       |                    |
| Yes                            | 0.88                                   | 0.70 - 2.42        | 0.93                                     | 0.30 - 2.85 | 0.90                                        | 0.98 - 2.28        | 1.05                                                            | 0.20 - 2.74        |
| <b>Sewer service</b>           |                                        |                    |                                          |             |                                             |                    |                                                                 |                    |
| No                             | Reference                              |                    | Reference                                |             | Reference                                   |                    | Reference                                                       |                    |
| Yes                            | 1.33                                   | 0.29 - 1.56        | 0.52                                     | 0.15 - 1.77 | 1.90                                        | 0.54 - 2.69        | 2.34                                                            | 0.12 - 3.92        |
| <b>Fever</b>                   |                                        |                    |                                          |             |                                             |                    |                                                                 |                    |
| No                             | Reference                              |                    | Reference                                |             | Reference                                   |                    | Reference                                                       |                    |
| Yes                            | 0.67                                   | 0.95 - 1.85        | 0.50                                     | 1.71 - 1.48 | 0.91                                        | 0.68 - 2.98        | 0.91                                                            | 0.55 - 2.14        |
| <b>Parasitaemia</b>            |                                        |                    |                                          |             |                                             |                    |                                                                 |                    |
| 1-1,999                        | 1.55                                   | 0.99 - 2.44        | 0.67                                     | 0.31 - 1.44 | 0.49                                        | 0.16 - 1.47        | 0.43                                                            | 0.17 - 1.04        |
| 2,000-4,999                    | 0.93                                   | 0.55 - 1.58        | 0.78                                     | 0.33 - 1.82 | 0.61                                        | 0.17 - 2.16        | <b>0.44</b>                                                     | <b>0.21 - 0.92</b> |
| 5,000-9,999                    | 0.94                                   | 0.56 - 1.57        | 0.63                                     | 0.25 - 1.57 | <b>0.18</b>                                 | <b>0.35 - 0.93</b> | <b>0.26</b>                                                     | <b>0.09 - 0.68</b> |
| >9,999                         | Reference                              |                    | Reference                                |             | Reference                                   |                    | Reference                                                       |                    |

Values in bold= p<0.05

<sup>a</sup>OR adjusted for age, area, parasitaemia (thick blood smear detection), access to basic services (public water and electricity supply, sewerage service), nearby water stagnations, use of mosquito nets and use of insecticides.
